## Pulmonary sarcomatoid carcinoma: University of Cincinnati experience

Nagla Abdel Karim<sup>1</sup>, James Schuster<sup>2</sup>, Ihab Eldessouki<sup>1</sup>, Ola Gaber<sup>1</sup>, Tariq Namad<sup>3</sup>, Jiang Wang<sup>4</sup>, Changchun Xie<sup>5</sup> and John C. Morris<sup>1</sup>

<sup>1</sup>Vontz Center for Molecular Studies, University of Cincinnati, Cincinnati, OH 45219, USA

<sup>2</sup>University of Cincinnati College of Medicine, Cincinnati, OH 45267, USA

<sup>3</sup>Military Hospital of Mohammed V, Department of Medical Oncology, Quartier Irfane, Rabat 10080, Morocco

<sup>4</sup>UC Health University Hospital, Department of Pathology and Laboratory Medicine, Cincinnati, OH 45219, USA

<sup>5</sup>Division of Biostatistics and Bioinformatics, Department of Environmental Health, Cincinnati, OH 45267, USA

**Correspondence to:** Ola Gaber, **email:** gaberola@ucmail.uc.edu

**Keywords:** chemotherapy; lung cancer; non-small cell lung cancer; sarcomatoid

**Received:** October 10, 2017

**Accepted:** November 19, 2017

**Published:** December 18, 2017

**Copyright:** Abdel Karim et al. This is an open-access article distributed under the terms of the Creative Commons Attribution License 3.0 (CC BY 3.0), which permits unrestricted use, distribution, and reproduction in any medium, provided the original author and source are credited.

### ABSTRACT

**Objectives:** To review the outcomes of treatment in patients with pulmonary sarcomatoid carcinoma (PSC) treated at the University of Cincinnati Medical Center (UCMC).

**Results:** There was no significant difference in survival of patients treated with chemotherapy alone (median, 256 days) compared to patients not undergoing treatment (median, 205.5 days). Patients who underwent surgery and adjuvant chemotherapy showed a trend in improvement of survival (median, 457.6 days). Patients requiring only surgery had the longest OS of 713.5 days.

**Conclusions:** Systemic chemotherapy alone did not improve survival in patients with PSC. Surgery provides the greatest overall survival benefit and adjuvant chemotherapy may also improve survival.

**Methods:** From 2000 to 2014, twenty-five patients with pathologically confirmed PSC were treated at UCMC. The outcomes were retrospectively analyzed by treatment with overall survival (OS) as the endpoint.

### INTRODUCTION

Pulmonary sarcomatoid carcinoma (PSC) is a rare subtype of poorly differentiated non-small-cell lung carcinoma (NSCLC) that accounts for 0.1%–0.4% of all lung cancers [1–3]. PSC carries a poor prognosis compared to the other types of NSCLC even in early stage disease [4]. PSC typically occurs in older, heavy smoking men and has a predilection for upper lobe involvement [5, 6]. The sensitivity PSC to chemotherapy is controversial; however, surgery in early stage disease has demonstrated survival benefit [5, 7].

Pathologically PSC demonstrates both epithelial and mesenchymal elements in the tumor distinguishing it from other types of NSCLC. PSC was initially described Virchow in 1865 as a “biphasic” lesion of adenocarcinomatous or squamous cell components along with spindle or giant

cell elements forming at least 10% of the tumor mass [8]. This description fulfills the current WHO criteria for the diagnosis of PSC. Based on the WHO criteria, five subgroups of PSC exist: pleomorphic carcinoma, spindle cell carcinoma, giant cell carcinoma, carcinosarcoma, and pulmonary blastoma [3]. Overall, it has proven difficult to formulate treatment recommendations for PSC due to its rarity, rapid progression and short survival, and heterogeneous pathological qualities.

Genomic analysis has revealed a common origin of both the epithelial and mesenchymal elements and it is thought that epithelial-mesenchymal transition (EMT) is the mechanism that gives rise to this tumor, with the epithelial elements, adenocarcinoma or squamous components, having undergone a transition to a poorly-differentiated mesenchymal or “sarcomatoid” phenotype

with the expression of mesenchymal proteins such as vimentin [9, 10]. Ultimately, efforts to study PSC have been hindered by the rarity of this NSCLC variant.

## RESULTS

We identified 25 patients with a diagnosis of PSC (Table 1). The 16 men and 9 women had a median age of 57 years (range, 31–83 years). Chemotherapy was most often used in advanced stage disease (stage 3, 4). Unfortunately, treatment with systemic chemotherapy did not show a significant improvement in outcome ( $p = 0.451$ , HR 0.638). Patients who underwent surgery and systemic chemotherapy showed a trend toward improvement in outcome ( $p = 0.08$  and HR 0.04). Their median OS was 457.6 days (95% CI 206–1187 days). Patients who underwent surgical resection only had the best median overall survival of 713.5 days (95% CI, 246–1138 days) (Table 2).

All patients treated with systemic chemotherapy had a median OS of 375 days (95% CI, 114–600 days). In patients treated with systemic chemotherapy only, their median OS was 256 days (95% CI 114–600 days). These were patients with advanced disease at diagnosis. Patients who received neither chemotherapy nor surgery had a median OS of 205.5 (95% CI 98–447 days), (Figure 1).

Age ( $p = 0.39$  and HR 0.98) showed a trend for overall survival, on contrary to gender where female showed better OS response. The patient who demonstrated the longest OS received systemic therapy including cisplatin, gemcitabine, docetaxel and crizotinib. Two of the patients in the study demonstrated EML-4/ALK translocations (Figure 2).

## DISCUSSION

The rarity pulmonary sarcomatoid carcinoma and the difficulty of pathological diagnosis make it a difficult malignancy to study. A search of PubMed entries between 01/01/1995 and 09/01/2016 using the keywords “pulmonary”, “sarcomatoid”, and “carcinoma” identified 11 retrospective studies addressing chemotherapy and surgical resection of PSC. Two studies have reported the median overall survival of PSC treated with systemic chemotherapy compared to no chemotherapy. Although limited in size, our study quantifies the median overall survival of patients with PSC treated with systemic chemotherapy and surgery, surgery alone, systemic chemotherapy alone, and no treatment. No study to date has compared the outcomes of these different patient groups in a single study. Table 3 shows our findings compared to other reports.

Prognosis of PSC is poor, even when compared to other types of NSCLC. The efficacy of systemic chemotherapy has varied with some studies showing no overall survival benefit and others showing a modest benefit [2, 5, 6, 11]. Our study demonstrates advanced PSC

has minimal sensitivity to chemotherapy, with an increase median OS of 256 days with systemic chemotherapy only compared to 205.5 days without any treatment. Chemotherapy does not appear to significantly improve overall survival and may not be useful in advanced disease.

Surgery in early stage operable PSC has proven to be the greatest overall survival benefit and remains the standard of care among candidates. The results from our study are consistent with other reports and demonstrate an overall survival at 713.5 days with surgical intervention. Additionally, in patients who required chemotherapy, the patients who underwent systemic chemotherapy and surgery had an OS of 457.5 days compared to 256 days with chemotherapy alone.

In non-small cell lung carcinoma, alternatives to chemotherapy are under investigation with the development of molecular targeted therapies. Unfortunately, little data is available regarding targeted therapy in PSC. Studies have shown that the prevalence of epidermal growth factor mutations (EGFR) mutation in PSC is similar to that of lung adenocarcinoma with a range of 0%–28% [12–16]. The efficacy of EGFR tyrosine kinase inhibitors in PSC has varied between studies, and the results have been indeterminate [15, 17]. Even less data is available regarding the ALK translocations. Studies have reported 3–5% of NSCLC demonstrate an EML4-ALK fusion gene [18–20]. In PSC, single cases of the EML4-ALK rearrangements have been reported and the effects of targeted therapies against this mutation have shown to be varied, but mostly ineffective or transient responses [6, 20–23].

In our study, two patients demonstrated EML4-ALK translocations. One of the patients received crizotinib and had the longest overall survival compared to the other patients studied. In addition to EGFR mutations and ALK translocations, MET amplification and MET exon 14 skipping were recently described in PSC, providing another possibility for targeted therapy [12]. Considering that crizotinib targets both ALK and MET mutations, this agent may play an important role in treating patients with PSC [24]. Additional studies are required to determine the efficacy of molecular targeted therapies against PSC.

In addition to chemotherapy and targeted therapy, immunotherapy has demonstrated encouraging results in the treatment of NSCLC. Specifically, monoclonal antibodies directed against the programmed death 1 (PD-1)/PD ligand-1 (PD-L1) system improved overall survival in NSCLC compared to chemotherapy after disease progression [25]. PD-1 and PD-L1 expression has been examined in PSC. Two studies found a prevalence of PD-L1 expression in 53% and 69.2% of sarcomatoid carcinomas, respectively [26, 27]. In a study evaluating pleomorphic carcinomas, a subtype of PSC, the prevalence was even higher at 90.2% [28]. This suggests PSC expresses greater levels of PD-L1 compared to other NSCLCs and may represent a potential therapeutic target for PSC.

**Table 1: Baseline characters and demographics of sarcomatoid lung cancer patients (n = 25)**

| Patient | Age (years) | Gender | Race | Smoking, (PPY) |
|---------|-------------|--------|------|----------------|
| Pt_1    | 57          | M      | AA   | Smoker, 40     |
| Pt_2    | 56          | M      | W    | Smoker, 40     |
| Pt_3    | 56          | F      | W    | Non-smoker     |
| Pt_4    | 31          | F      | W    | Smoker, 43     |
| Pt_5    | 76          | M      | W    | Smoker, 43     |
| Pt_6    | 51          | M      | W    | Smoker, 60     |
| Pt_7    | 73          | F      | W    | Smoker, 54     |
| Pt_8    | 83          | M      | W    | Smoker, 70     |
| Pt_9    | 62          | M      | W    | Smoker, 40     |
| Pt_10   | 47          | M      | W    | Smoker, 20     |
| Pt_11   | 51          | M      | AA   | Smoker, 50     |
| Pt_12   | 68          | F      | W    | Smoker, 50     |
| Pt_13   | 69          | M      | W    | Non-smoker     |
| Pt_14   | 66          | M      | W    | Smoker, 56     |
| Pt_15   | 68          | M      | W    | Smoker, 45     |
| Pt_16   | 57          | M      | W    | Smoker, 40     |
| Pt_17   | 67          | F      | W    | Smoker, 50     |
| Pt_18   | 54          | M      | AA   | Smoker, 38     |
| Pt_19   | 84          | F      | W    | Non-smoker     |
| Pt_20   | 57          | F      | W    | Smoker, 36     |
| Pt_21   | 71          | M      | W    | Smoker, 43     |
| Pt_22   | 54          | M      | W    | Non-smoker     |
| Pt_23   | 70          | M      | W    | Smoker, 56     |
| Pt_24   | 59          | F      | AA   | Smoker, 40     |
| Pt_25   | 59          | F      | W    | Smoker, 50     |

Abbreviations: EGFR, epidermal growth factor receptor; EML-4/ALK, echinoderm-like microtubule-like protein-4/anaplastic lymphoma kinase; HR, hazard ratio; NSCLC, non-small cell lung cancer; PSC, pulmonary sarcomatoid carcinoma; OS, overall survival, M: male, F: female, W: white American, AA: African American, PPY: Pack per year. Pt: patient.

## CONCLUSIONS

Overall, pulmonary sarcomatoid carcinoma is a rare, undifferentiated NSCLC histology that has a poor prognosis. Surgery remains the best option in early stage disease. Patients with PSC do not seem to benefit from systemic chemotherapy except perhaps as adjuvant treatment after surgery. Adjuvant chemotherapy does seem to improve overall survival and should be considered in treatment of PSC. Larger prospective studies are needed to further define the efficacy and role of systemic chemotherapy in patients with PSC. Other therapeutic

agents, including targeted therapies and immunotherapy also require additional research.

## MATERIALS AND METHODS

This retrospective study included all patients with a pathologically confirmed diagnosis of PSC treated at the University of Cincinnati Medical Center (UCMC) between the years 2000–2014 obtained by a review of a pathology database and the institutional tumor registry for these years. Death was considered as the study endpoint. Kaplan-Meier analysis was used to calculate median

**Table 2: Treatment strategies adopted in the sarcomatoid lung cancer patients according to their stage (n = 25)**

| Patient | Stage                | Surgery                                                             | Radiotherapy                    | Chemotherapy                                                                                       |
|---------|----------------------|---------------------------------------------------------------------|---------------------------------|----------------------------------------------------------------------------------------------------|
| Pt_1    | Stage III            | No                                                                  | Yes; concurrent chemoradiation  | Neoadjuvant; Cisplatin-Gemzar, carbo-taxol                                                         |
| Pt_2    | Stage III            | No                                                                  | Yes; concurrent chemoradiation  | 1st L Carbo Alimta + Radiation, 2d L: Taxoter (4C)àDP, 3th L:Gemzar (3C) àDP, 4th L: Phase 1 study |
| Pt_3    | Stage II             | Right middle lobectomy                                              | Left L2 pedicle (24 Gy)         | 4 cycles Cisplatin-gemzar                                                                          |
| Pt_4    | Stage Ib             | RLL lobectomy                                                       | No                              | No                                                                                                 |
| Pt_5    | Stage Ib             | Right VTAS + RLL lobectomy                                          | No                              | No                                                                                                 |
| Pt_6    | Stage II             | Right thoracotomy with upper lobe sleeve lobectomy                  | No                              | No                                                                                                 |
| Pt_7    | Stage III            | Sub carinal lymph node EBUS aspiration                              | No                              | Carboplatine + alimta                                                                              |
| Pt_8    | Stage IV             | No                                                                  | No                              | No                                                                                                 |
| Pt_9    | Stage IIb            | Left thoracotomy + LLLlobectomy + mediastinal lymph nodes resection | Adrenal radiation               | Adjuvant Carboplatine-Taxol (6C) àDP                                                               |
| Pt_10   | Stage IV             | No                                                                  | Right lung +mediastinum (60 Gy) | No                                                                                                 |
| Pt_11   | Stage IV             | No                                                                  | No                              | No                                                                                                 |
| Pt_12   | Stage II             | Right posterior upper lobectomy + mediastinal lymph node resection  | No                              | No                                                                                                 |
| Pt_13   | Stage Ib             | RLL VATS lobectomy                                                  | No                              | No                                                                                                 |
| Pt_14   | Stage Ib             | Right VTAS RLL lobectomy                                            | No                              | No                                                                                                 |
| Pt_15   | Stage II             | Right parietal resection                                            | No                              | No                                                                                                 |
| Pt_16   | Stage III            | No                                                                  | No                              | Carboplatine + Taxol (1 cycle)                                                                     |
| Pt_17   | Stage II             | Left posterior thoracotomy with wedge resection                     | No                              | No                                                                                                 |
| Pt_18   | Diagnosed on Autopsy | No                                                                  | No                              | No                                                                                                 |
| Pt_19   | Stage II             | RUL lung lobectomy + thoracic Lymph nodes adenectomy                | No                              | No                                                                                                 |
| Pt_20   | Stage II             | Left thoracotomy + left upper lobectomy                             | No                              | No                                                                                                 |
| Pt_21   | Stage Ib             | RUL lobectomy                                                       | Lower back palliative radiation | No                                                                                                 |
| Pt_22   | Stage IV             | No                                                                  | No                              | No                                                                                                 |
| Pt_23   | Stage IV             | Brain surgery for lung cancer metastasis                            | Brain radiation                 | No                                                                                                 |
| Pt_24   | Stage II             | Right Lung mass resection<br>Brain metastasis resection             | Local chest radiation           | No                                                                                                 |
| Pt_25   | Stage III            | No                                                                  | No                              | Carboplatine-Taxol                                                                                 |

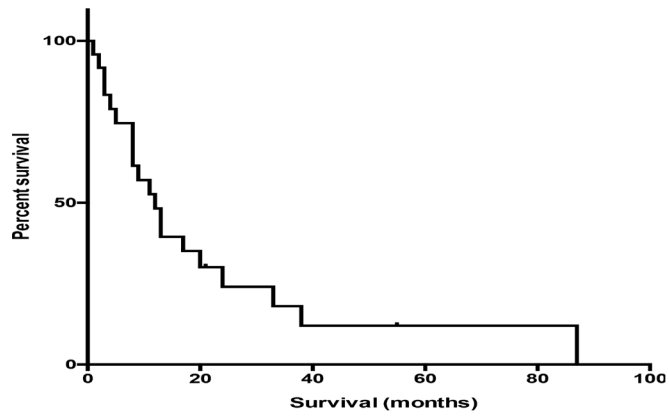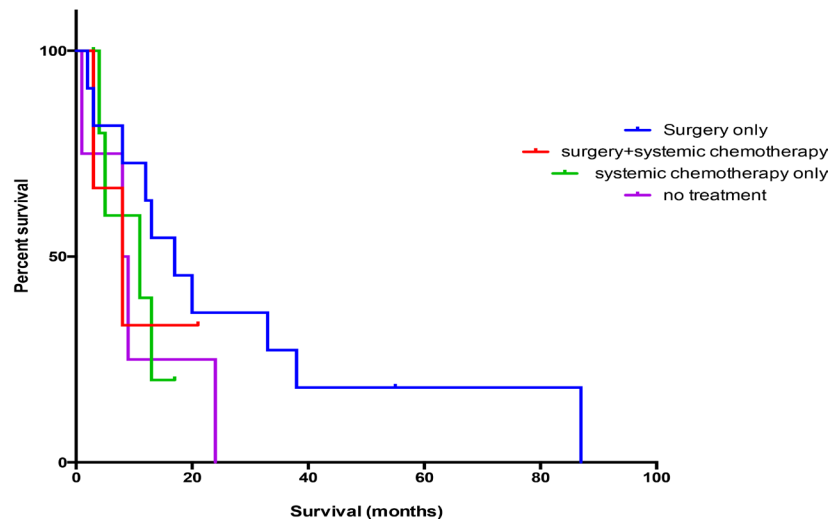

Figure 1: Survival of sarcomatoid lung cancer patients ( $n = 25$ ).

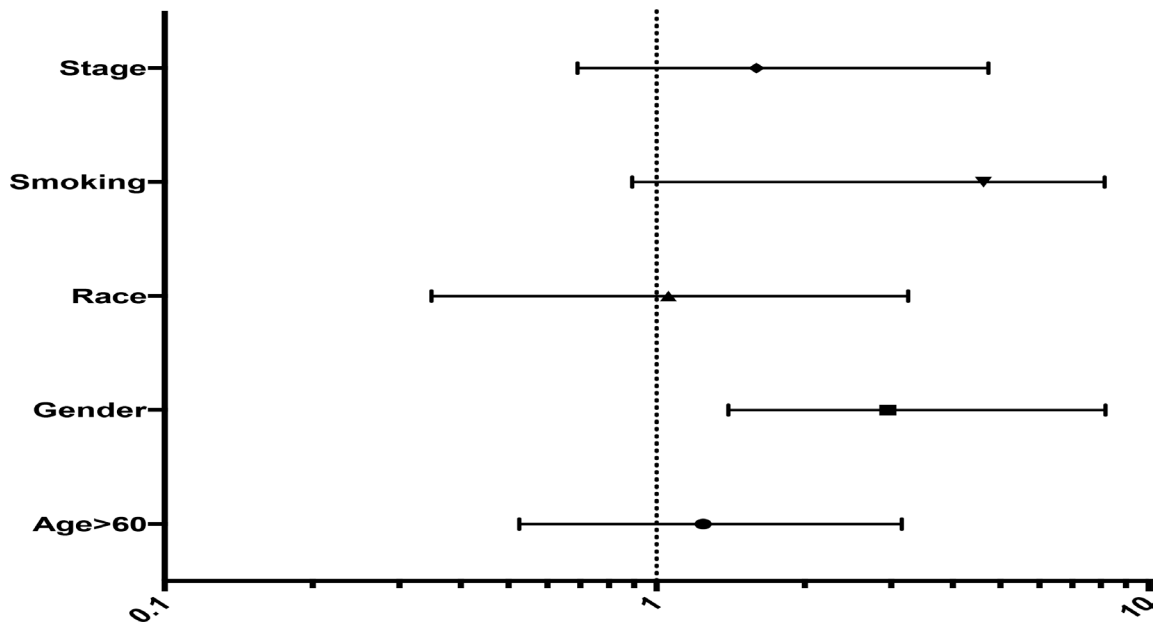

Figure 2: Forest Plot showing hazard ratio for different parameters. Smoking had the highest impact followed by stage, being the main detrimental factor for the type treatment the patient receives.

**Table 3: Median overall survival in patients with pulmonary sarcomatoid carcinoma (PSC) with various treatments**

| Location/<br>Date of Study | Patients | Systemic<br>Chemotherapy<br>and Surgery | Surgery<br>Only | Systemic<br>Chemotherapy<br>Only | Without Systemic<br>Chemotherapy or<br>Surgery | Reference |
|----------------------------|----------|-----------------------------------------|-----------------|----------------------------------|------------------------------------------------|-----------|
| UCMC, 2016                 | 21       | 457.5                                   | 713.5           | 256                              | 205.5                                          | -         |
| China, 2013                | 51       | 516.8                                   | 167.2           | -                                | 106.8                                          | 2         |
| France, 2016               | 93       | -                                       | -               | 130.7                            | -                                              | 1         |
| Japan, 2015                | 16       | -                                       | -               | 212.8*                           | -                                              | 15        |
| Italy, 2003                | 75       | -                                       | 577.6           | -                                | -                                              | 29        |

\*Median overall survival of patients with only the pleomorphic subtype of pulmonary sarcomatoid carcinoma. In studies that measure median overall survival in months, 1 month = 30.4 days.

overall survival (OS) and 95% confidence intervals (CI). The Cox model was used to test the chemotherapy effect adjusted for age, sex and surgery, and determine hazard ratios (HR). Data was analyzed using SAS® version 9.4.

## CONFLICTS OF INTEREST

No potential conflicts of interest exists.

## FUNDING

The work was funded by an internal grant.

## REFERENCES

1. Ung M, Rouquette I, Filleron T, Taillandy K, Brouchet L, Bennouna J, Delord JP, Milia J, Mazières J. Characteristics and Clinical Outcomes of Sarcomatoid Carcinoma of the Lung. *Clin Lung Cancer*. 2016; 17:391–397. <https://doi.org/10.1016/j.clcc.2016.03.001>.
2. Huang SY, Shen SJ, Li XY. Pulmonary sarcomatoid carcinoma: a clinicopathologic study and prognostic analysis of 51 cases. *World J Surg Oncol*. 2013; 11:252. <https://doi.org/10.1186/1477-7819-11-252>.
3. Brambilla E, Travis WD, Colby TV, Corrin B, Shimosato Y. The new World Health Organization classification of lung tumours. *Eur Respir J*. 2001; 18:1059–68. <https://doi.org/10.1183/09031936.01.00275301>.
4. Yendamuri S, Caty L, Pine M, Adem S, Bogner P, Miller A, Demmy TL, Groman A, Reid M. Outcomes of sarcomatoid carcinoma of the lung: a Surveillance, Epidemiology, and End Results Database analysis. *Surgery*. 2012; 152:397–402. <https://doi.org/10.1016/j.surg.2012.05.007>.
5. Lin Y, Yang H, Cai Q, Wang D, Rao H, Lin S, Long H, Fu J, Zhang L, Lin P, Xu G, Rong T, Xiong X, et al. Characteristics and Prognostic Analysis of 69 Patients With Pulmonary Sarcomatoid Carcinoma. *Am J Clin Oncol*. 2016; 39:215–22. <https://doi.org/10.1097/COC.000000000000101>.
6. Gu L, Xu Y, Chen Z, Pan Y, Lu S. Clinical analysis of 95 cases of pulmonary sarcomatoid carcinoma. *Biomed Pharmacother*. 2015; 76:134–40. <https://doi.org/10.1016/j.biopha.2015.10.009>.
7. Ouziane I, Boutayeb S, Mrabti H, Lalya I, Rimani M, Errihani H. Sarcomatoid carcinoma of the lung: a model of resistance of chemotherapy. *N Am J Med Sci*. 2014; 6:342–45. <https://doi.org/10.4103/1947-2714.136920>.
8. Saphir O, Vass A. Carcinosarcoma. *Am J Cancer. American Association for Cancer Research Journals*. 1938; 33:331–61. <https://doi.org/10.1158/ajc.1938.331>.
9. Cates JM, Dupont WD, Barnes JW, Edmunds HS, Fasig JH, Olson SJ, Black CC. Markers of epithelial-mesenchymal transition and epithelial differentiation in sarcomatoid carcinoma: utility in the differential diagnosis with sarcoma. *Appl Immunohistochem Mol Morphol*. 2008; 16:251–62. <https://doi.org/10.1097/PAI.0b013e318156e9b4>.
10. Blaukovitsch M, Halbwedl I, Kothmaier H, Gogg-Kammerer M, Popper HH. Sarcomatoid carcinomas of the lung—Are these histogenetically heterogeneous tumors? *Virchows Arch*. 2006; 449:455–61. <https://doi.org/10.1007/s00428-006-0256-8>.
11. Park JS, Lee Y, Han J, Kim HK, Choi YS, Kim J, Shim YM, Kim K. Clinicopathologic outcomes of curative resection for sarcomatoid carcinoma of the lung. *Oncology*. 2011; 81:206–13. <https://doi.org/10.1159/000333095>.
12. Liu X, Jia Y, Stoopler MB, Shen Y, Cheng H, Chen J, Mansukhani M, Koul S, Halmos B, Borczuk AC. Next-generation sequencing of pulmonary sarcomatoid carcinoma reveals high frequency of actionable MET gene mutations. *J Clin Oncol. J Clin Oncol*. 2016; 34:794–802. <https://doi.org/10.1200/JCO.2015.62.0674>.
13. Fallet V, Saffroy R, Girard N, Mazieres J, Lantuejoul S, Vieira T, Rouquette I, Thivolet-Bejui F, Ung M, Poulot V, Schlick L, Moro-Sibilot D, Antoine M, et al. High-throughput somatic mutation profiling in pulmonary sarcomatoid carcinomas using the LungCarta™ Panel: exploring therapeutic targets. *Ann Oncol*. 2015; 26:1748–53. <https://doi.org/10.1093/annonc/mdv232>.

14. Jiang X, Liu Y, Chen C, Zhan Z, Yan Q, Guo Y, Wang Q, Li K. The value of biomarkers in patients with sarcomatoid carcinoma of the lung: molecular analysis of 33 cases. *Clin Lung Cancer*. 2012; 13:288–96. <https://doi.org/10.1016/j.clcc.2011.11.004>.
15. Tamura Y, Fujiwara Y, Yamamoto N, Nokihara H, Horinouchi H, Kanda S, Goto Y, Kubo E, Kitahara S, Tsuruoka K, Tsuta K, Ohe Y. Retrospective analysis of the efficacy of chemotherapy and molecular targeted therapy for advanced pulmonary pleomorphic carcinoma. *BMC Res Notes*. 2015; 8:800. <https://doi.org/10.1186/s13104-015-1762-z>.
16. Mizuno K, Fukai I, Murata T, Goto T. Pulmonary pleomorphic carcinoma. *Research Gate*. 2006; 65:863–66.
17. Ushiki A, Koizumi T, Kobayashi N, Kanda S, Yasuo M, Yamamoto H, Kubo K, Aoyagi D, Nakayama J. Genetic heterogeneity of EGFR mutation in pleomorphic carcinoma of the lung: response to gefitinib and clinical outcome. *Jpn J Clin Oncol*. 2009; 39:267–0. <https://doi.org/10.1093/jjco/hyn155>.
18. Soda M, Choi YL, Enomoto M, Takada S, Yamashita Y, Ishikawa S, Fujiwara S, Watanabe H, Kurashina K, Hatanaka H, Bando M, Ohno S, Ishikawa Y, et al. Identification of the transforming EML4-ALK fusion gene in non-small-cell lung cancer. *Nature*. 2007; 448:561–66. <https://doi.org/10.1038/nature05945>.
19. Koivunen JP, Mermel C, Zejnullahu K, Murphy C, Lifshits E, Holmes AJ, Choi HG, Kim J, Chiang D, Thomas R, Lee J, Richards WG, Sugarbaker DJ, et al. EML4-ALK fusion gene and efficacy of an ALK kinase inhibitor in lung cancer. *Clin Cancer Res*. 2008; 14:4275–83. <https://doi.org/10.1158/1078-0432.CCR-08-0168>.
20. Boland JM, Erdogan S, Vasmataz G, Yang P, Tillmans LS, Johnson MR, Wang X, Peterson LM, Halling KC, Oliveira AM, Aubry MC, Yi ES. Anaplastic lymphoma kinase immunoreactivity correlates with ALK gene rearrangement and transcriptional up-regulation in non-small cell lung carcinomas. *Hum Pathol*. 2009; 40:1152–58. <https://doi.org/10.1016/j.humpath.2009.01.012>.
21. Murakami Y, Saka H, Oki M. Response to Crizotinib and Clinical Outcome in ALK-Rearranged Pulmonary Pleomorphic Carcinoma. *J Thorac Oncol*. 2015; 10:e28–29. <http://dx.doi.org/10.1097/JTO.0000000000000450>.
22. Kobayashi Y, Sakao Y, Ito S, Park J, Kuroda H, Sakakura N, Usami N, Mitsudomi T, Yatabe Y. Transformation to sarcomatoid carcinoma in ALK-rearranged adenocarcinoma, which developed acquired resistance to crizotinib and received subsequent chemotherapies. *J Thorac Oncol*. 2013; 8:e75–78. <https://doi.org/10.1097/JTO.0b013e318293d96f>.
23. Terra SB, Jang JS, Bi L, Kipp BR, Jen J, Yi ES, Boland JM. Molecular characterization of pulmonary sarcomatoid carcinoma: analysis of 33 cases. *Mod Pathol*. 2016; 29:824–31. <https://doi.org/10.1038/modpathol.2016.89>.
24. Jorge SE, Schulman S, Freed JA, VanderLaan PA, Rangachari D, Kobayashi SS, Huberman MS, Costa DB. Responses to the multitargeted MET/ALK/ROS1 inhibitor crizotinib and co-occurring mutations in lung adenocarcinomas with MET amplification or MET exon 14 skipping mutation. *Lung Cancer*. 2015; 90:369–74. <https://doi.org/10.1016/j.lungcan.2015.10.028>.
25. Borghaei H, Paz-Ares L, Horn L, Spigel DR, Steins M, Ready NE, Chow LQ, Vokes EE, Felip E, Holgado E, Barlesi F, Kohlhäufel M, Arrieta O, et al. Nivolumab versus Docetaxel in Advanced Nonsquamous Non-Small-Cell Lung Cancer. *N Engl J Med*. 2015; 373:1627–39. <https://doi.org/10.1056/NEJMoa1507643>.
26. Vieira T, Antoine M, Hamard C, Fallet V, Duruisseaux M, Rabbe N, Rodenas A, Cadranet J, Wislez M. Sarcomatoid lung carcinomas show high levels of programmed death ligand-1 (PD-L1) and strong immune-cell infiltration by TCD3 cells and macrophages. *Lung Cancer*. 2016; 98:51–58. <https://doi.org/10.1016/j.lungcan.2016.05.013>.
27. Velcheti V, Rimm DL, Schalper KA. Sarcomatoid lung carcinomas show high levels of programmed death ligand-1 (PD-L1). *J Thorac Oncol*. 2013; 8:803–05. <https://doi.org/10.1097/JTO.0b013e318292be18>.
28. Kim S, Kim MY, Koh J, Go H, Lee DS, Jeon YK, Chung DH. Programmed death-1 ligand 1 and 2 are highly expressed in pleomorphic carcinomas of the lung: Comparison of sarcomatous and carcinomatous areas. *Eur J Cancer*. 2015; 51:2698–707. <https://doi.org/10.1016/j.ejca.2015.08.013>.
